# Supplementary material for: PROTEIN PHOSPHATASE 2C08, a Negative Regulator of Abscisic Acid Signaling, Promotes Internode Elongation in Rice
Source: MDPI journal article supplement (doi:10.3390/ijms241310821), 2023-06-28
Supplement: s1 [file s1]

**Supplementary Materials:**

**Table S1.** Primer sequences for qPCR analysis

| <b>Transcript</b> | <b>Direction</b> | <b>Sequence (5' to 3')</b> |
|-------------------|------------------|----------------------------|
| <i>OsPP2C08</i>   | Forward          | GGCTGTGGGATGTGGTATCC       |
|                   | Reverse          | CGTTCTACTCCTCAGCCGTC       |
| <i>OsRAB16</i>    | Forward          | CATGGACAAGATCAAGGAGAAGC    |
|                   | Reverse          | CTTATTATTCAGGAAGGTGACGTGG  |
| <i>OsLEA03</i>    | Forward          | GCCGTGAATGATTTCCTTTG       |
|                   | Reverse          | CACACCCGTCAGAAATGCTCC      |
| <i>OsKAO</i>      | Forward          | CTTCGCAAGAGCAAAGGCTG       |
|                   | Reverse          | TCCACCCCTTGGGGATAAGA       |
| <i>OsGA20ox4</i>  | Forward          | AGTTCTTCGAGGACAGCAGC       |
|                   | Reverse          | CGATGTTGACGACGAACGC        |
| <i>OsGA2ox4</i>   | Forward          | GCAGCTCATCTCCATCCTCC       |
|                   | Reverse          | CTCGACTTGAGCTTGTTGGC       |
| <i>OsUbi05</i>    | Forward          | CGCCGTGCTCCAGTTCTACAAGG    |
|                   | Reverse          | TCCTTCCTTACTCCGCCCCCA      |

**Table S2.** Days to 50% flowering of WT and OsPP2C08-OX plants

|             | <b>Seed disinfection</b> | <b>Transplanting in paddy field</b> | <b>flowering</b> |
|-------------|--------------------------|-------------------------------------|------------------|
| WT          | April 30                 | June 6                              | August 21        |
| OsPP2C08-OX | May 2nd                  | June 6                              | August 19        |

**A**

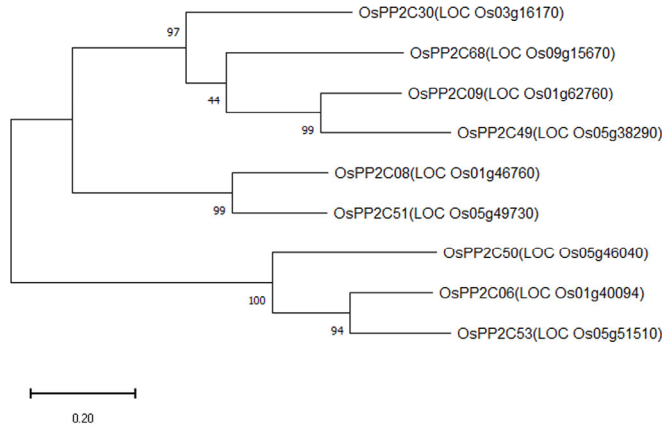

**B**

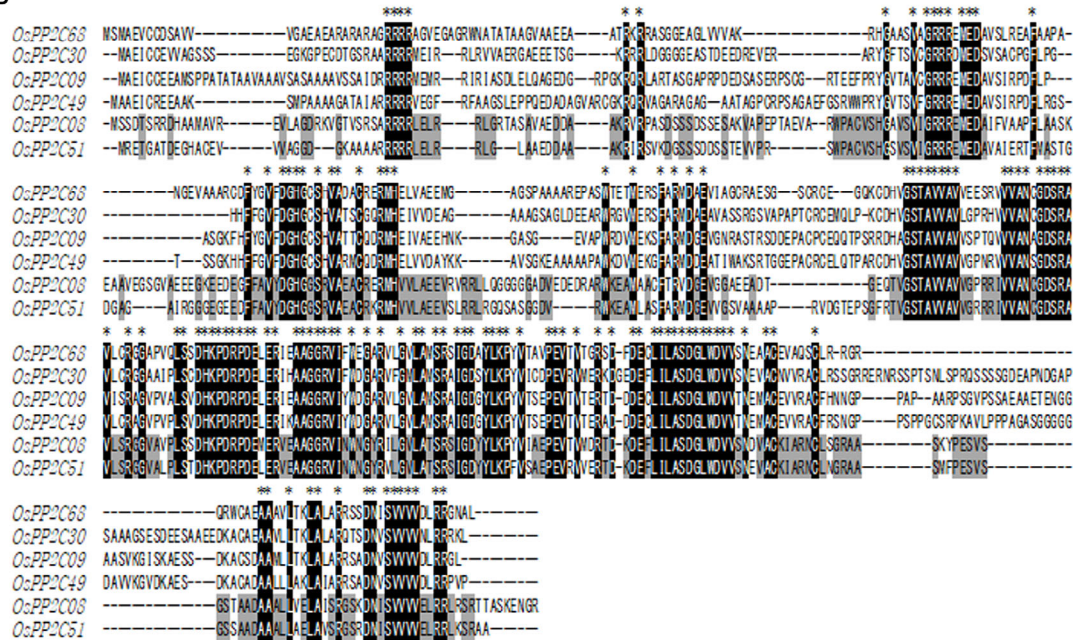

**Figure S1.** Amino acid sequence comparison of Clade A protein phosphatase 2Cs (PP2Cs). A. Maximum likelihood phylogenetic tree with 1,000 bootstrap replications based on the Clade A PP2Cs in rice. The deduced amino acid sequences were aligned using ClustalW, and the phylogenetic tree was drawn using the maximum likelihood method. Bootstrap values are shown at the nodes as a percentage of 1,000 replications. The tree is drawn to scale, with branch lengths, measured in the number of substitution per site. B. Alignment of amino acid sequences of rice Clade A PP2Cs. Black boxes indicate conserved residues in rice PP2CAs. Gray boxes indicate conserved residues only between OsPP2C08 and OsPP2C51.
